# Supplementary material for: Transient cardiac dysfunction but elevated cardiac and kidney biomarkers 24 h following an ultra-distance running event in Mexican Tarahumara
Source: PubMed Central journal article supplement (PMC5725886; doi:10.1186/s13728-017-0057-5), 2017-12-11
Supplement: 13728_2017_57_MOESM1_ESM.pdf [file 13728_2017_57_MOESM1_ESM.pdf]

**Physical activity questionnaire Guachochi, Chihuahua, México, July 2012**

Study no. \_\_\_\_\_

Sex \_\_\_\_\_

Name \_\_\_\_\_

Born (place and country) \_\_\_\_\_

Date of birth (day/month/year) \_\_\_\_\_

Age \_\_\_\_\_

Country of citizenship \_\_\_\_\_

Country of residency \_\_\_\_\_

Origin of father \_\_\_\_\_

Origin of mother \_\_\_\_\_

Origin of paternal grandfather \_\_\_\_\_

Origin of paternal grandmother \_\_\_\_\_

Origin of maternal grandfather \_\_\_\_\_

Origin of maternal grandmother \_\_\_\_\_

1. When did you start running (organized training/competition) \_\_\_\_\_

1. Desde cuando comenzó usted a correr para competir (entrenamientos y competencias)?

2. Did you walk/run to and from school? \_\_\_\_\_

2. Cuando usted iba a la escuela o a otros lugares, se iba corriendo o caminaba de un lugar a otro?

3. If yes, for how many years and how far \_\_\_\_\_

3. Si corría o se iba caminando de un lugar a otro, por cuantos años lo hizo?

4. How long of a distance did you use to run on those occasions, and how many days per week, more or less? \_\_\_\_\_

4. Qué distancias recorría usted en esas ocasiones y cuántos días por semana, más o menos?

5. (For non-Rarámuri runners): At what age did you start training for long distance running? \_\_\_\_\_

5. (Para competidores no-Rarámuris): a qué edad comenzó usted a entrenar para carreras de gran distancia?

6. Did you ever have to stop your training program because of injury or disease?

Yes \_\_\_\_\_ No \_\_\_\_\_

6. Has parado tu entrenamiento por causa de una lesión o enfermedad?

Sí \_\_\_\_\_ No \_\_\_\_\_

7. (For Raramuri only): If you used to cover those distances either running or walking, did you have to stop doing it for some time because of injury or disease?

Yes \_\_\_\_\_ No \_\_\_\_\_

7. (Para Rarámuri solamente) Si usted hacía sus recorridos caminando o corriendo, tuvo alguna vez que dejar de hacerlo por lastimarse o enfermarse?

Si \_\_\_\_\_ No \_\_\_\_\_

8. If yes, could you please specify the cause \_\_\_\_\_

8 Si dice si, por favor especifica la causa

9. (Non-Rarámuri only): for how long could you not continue your training? \_\_\_\_\_

9. Por cuánto tiempo no pudo usted continuar su entrenamiento?

9. (Para Rarámuri solamente): Cuál fue la razón por la que tuvo que dejar de correr?

10. When you had to stop running due to injury/illness, did you then engage in any other sport (f. ex. Swimming, bicycling)? \_\_\_\_\_

Yes \_\_\_\_\_ No \_\_\_\_\_

10. Cuando detuvo su entrenamiento debido a lesión/enfermedad, participó en otro deporte ( por ejemplo, natación o ciclismo)?

Si \_\_\_\_\_ No \_\_\_\_\_

11. Specify your running pattern over the past year? \_\_\_\_\_

---

11. (Para Rarámuri solamente): Puede describir lo que corrió (entrenamiento y carrera) desde el año pasado hasta ahorita?

11. (Para no-Rarámuri solamente) Podría describir brevemente su programa de trabajo (entrenamiento y competencias) durante el último año?

12. How many competitions have you done over the past year? \_\_\_\_\_

12. (Para Rarámuri solamente) En cuántas carreras corrió usted desde el año pasado hasta ahorita?

12. (Para no-Rarámuri solamente) En cuántas competencias participó usted durante el último año?

13. What is a typical competition distance? \_\_\_\_\_

13. (Ambos grupos de competidores): Cuál es su distancia típica o habitual de competencia?

14. What is the furthest you have competed over the past year? Ever, in both training and actual competition? \_\_\_\_\_

14. (Ambos grupos de competidores): cuál fue la carrera más larga en la que participó del año pasado para acá, tanto en su entrenamiento como en competencia? Cuál ha sido su distancia más larga en entrenamiento o carrera en toda su vida?

15. Have you ever experienced chest pain in connection with running? If yes, please specify!

\_\_\_\_\_

15. Ha usted experimentado alguna vez dolor en el pecho que pudiera estar relacionado con correr?

Si le ha ocurrido, podría usted dar más detalles?

16. Have you ever had blood in your urine, either after training or competition? \_\_\_\_\_

16. Ha usted orinado sangre después de una carrera o de un entrenamiento?

17. If yes, did you experience any symptoms? If yes, please specify \_\_\_\_\_

17. Si su respuesta es sí, ha experimentado algún síntoma? Por favor, especifíquelo
